# Supplementary material for: Fatty acid status and behavioural symptoms of Attention Deficit Hyperactivity Disorder in adolescents: A case-control study
Source: Springer Nature journal article supplement (doi:10.1186/1475-2891-7-8), 2008-02-14

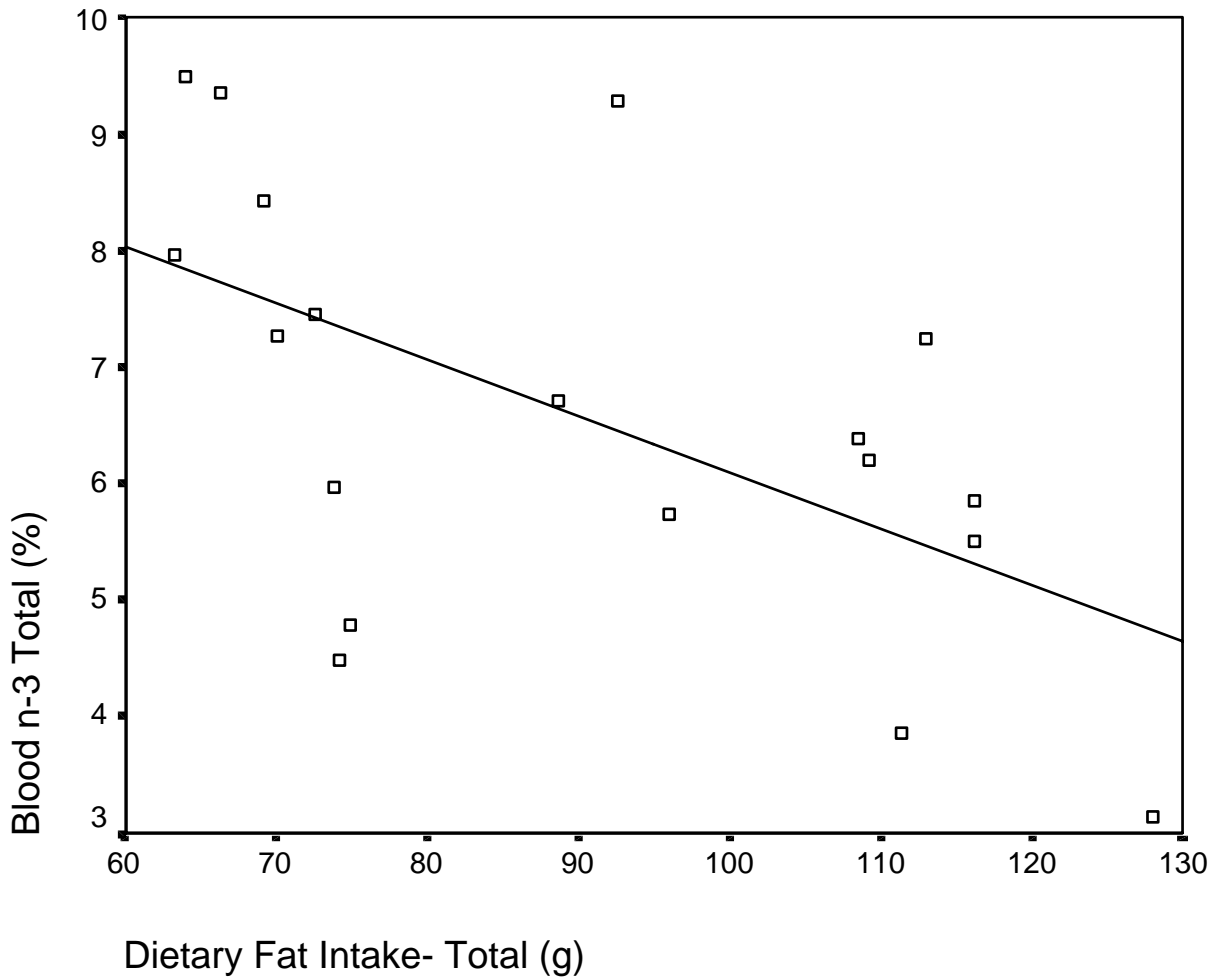

Supplement: 12937_2007_171_MOESM5_ESM.pdf [file 12937_2007_171_MOESM5_ESM.pdf]
